# Supplementary material
Source: Springer Nature journal article supplement (https://www.springermedizin.de/resource/supplementary/12936_2009_884_MOESM1_ESM.pdf/9548456)
Supplement: MOESM1 [file 9548456]

**Table 1:** *msp1* and *msp2* families' distribution according to urban and rural area

| Allelic family          | Urban area (Pissy) |      |             | Rural area (Balonghin) |      |              | <i>p</i> |
|-------------------------|--------------------|------|-------------|------------------------|------|--------------|----------|
|                         | n                  | %    | (95%CI)     | n                      | %    | (95 %CI)     |          |
| <b><i>Msp1</i></b>      |                    |      |             |                        |      |              |          |
| K1                      | 70                 | 93.3 | (87.4-99.1) | 83                     | 95.4 | (90.9-99.9)  | 0.8      |
| RO33                    | 54                 | 72.0 | (60.0-83.9) | 69                     | 79.3 | (69.7-88.9)  | 0.3      |
| Mad20                   | 64                 | 85.3 | (76.6-94.0) | 55                     | 63.2 | (50.5-75.9)  | 0.001    |
| <i>p</i>                | 0.002              |      |             | 0.000001               |      |              |          |
| <i>p</i> (K1vs RO33)    | 0.0006             |      |             | 0.0003                 |      |              |          |
| <i>p</i> (K1 vs MAD20)  | 0.11               |      |             | <<0.00001              |      |              |          |
| <i>p</i> (RO33vs MAD20) | 0.05               |      |             | 0.02                   |      |              |          |
| <b><i>Msp2</i></b>      |                    |      |             |                        |      |              |          |
| FC27                    | 41                 | 54.7 | (36.5-69.9) | 63                     | 86.3 | (77.8-94.8)  | 0.00003  |
| 3D7                     | 61                 | 81.3 | (71.5-91.1) | 50                     | 68.5 | (55.6- 81.4) | 0.07     |
| <i>p</i>                | 0,0005             |      |             | 0,01                   |      |              |          |
